# Supplementary material for: An evolutionarily conserved transcriptional response to viral infection in Caenorhabditis nematodes
Source: PubMed Central journal article supplement (PMC5392922; doi:10.1186/s12864-017-3689-3), 2017-04-17

A

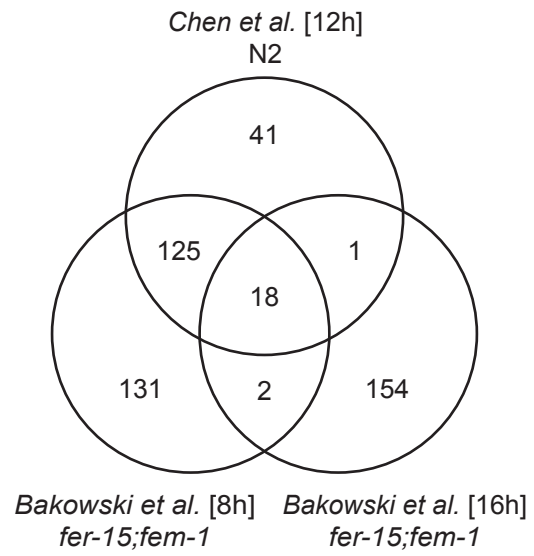

B

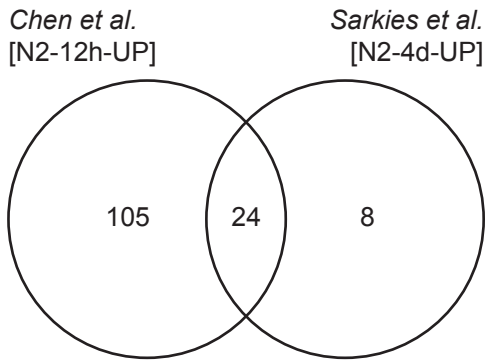

C

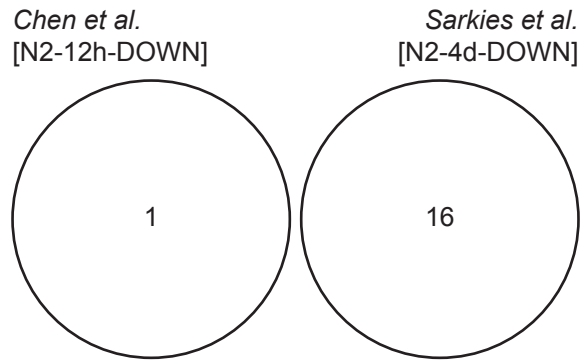

D

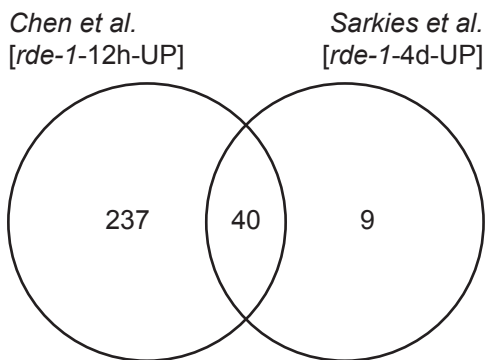

E

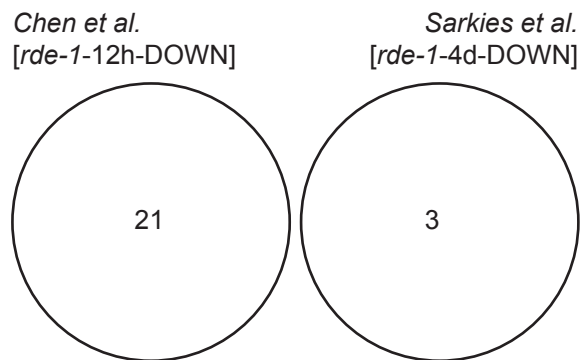

Supplement: 12864_2017_3689_MOESM4_ESM.pdf [file 12864_2017_3689_MOESM4_ESM.pdf]
